# Supplementary material for: Variability of Primary Sjögren's Syndrome Is Driven by Interferon‐α and Interferon‐α Blood Levels Are Associated With the Class II HLA–DQ Locus
Source: PubMed Central journal article supplement — Arthritis Rheumatol. 2022 Nov 2;74(12):1991–2002. doi: 10.1002/art.42265 (PMC10092541; doi:10.1002/art.42265), 2022-11-02
Supplement: ART-74-1991-s004.pdf [file ART-74-1991-s004.pdf]

| Cohort                      | Number of patients included in the transcriptomic (or Cytof) analysis | Number of control samples | Age (mean +/- SD) | Disease duration (year) | Anti-SSA (%) | ESSDAI (median, IQR) |
|-----------------------------|-----------------------------------------------------------------------|---------------------------|-------------------|-------------------------|--------------|----------------------|
| ASSESS                      | 351                                                                   | 0                         | 58 +/- 12         | 11.8 +/- 5.7            | 54%          | 2 [0; 7]             |
| Norwegian                   | 141                                                                   | 0                         | NA                | NA                      | 60%          | NA                   |
| Oklahoma (Lessard et al.)   | 222                                                                   | 32                        | NA                | NA                      | NA           | NA                   |
| UKpSS (James et al.)        | 160                                                                   | 29                        | 61 +/- 12         | 7.4 +/- 6.3             | NA           | 5 [2; 9]             |
| Bicetre (Mingueneau et al.) | 94                                                                    | 45                        | 54 +/- 5          | NA                      | 35%          | 2 [1; 4]             |
