# Supplementary material for: Variability of Primary Sjögren's Syndrome Is Driven by Interferon‐α and Interferon‐α Blood Levels Are Associated With the Class II HLA–DQ Locus
Source: PubMed Central journal article supplement — Arthritis Rheumatol. 2022 Nov 2;74(12):1991–2002. doi: 10.1002/art.42265 (PMC10092541; doi:10.1002/art.42265), 2022-11-02
Supplement: ART-74-1991-s005.pdf [file ART-74-1991-s005.pdf]

**A**

| Variable                               | Value                     |
|----------------------------------------|---------------------------|
| Female/Male ratio                      | 14.2                      |
| Mean ESSDAI                            | 4.6 ( $\pm 5.0$ )         |
| % anti-SSA positive                    | 58.2%                     |
| % anti-SSB positive                    | 33.3%                     |
| % with lymphoma                        | 6.25%                     |
| % with family history AI disease       | 17.3 %                    |
| Mean age                               | 58.1 years ( $\pm 12.2$ ) |
| Mean weight                            | 63.4 kg ( $\pm 13.8$ )    |
| Currently treated with corticosteroids | 32.9%                     |
| Currently treated with chloroquine     | 31.4%                     |
| % with an active biological domain     | 37.1%                     |

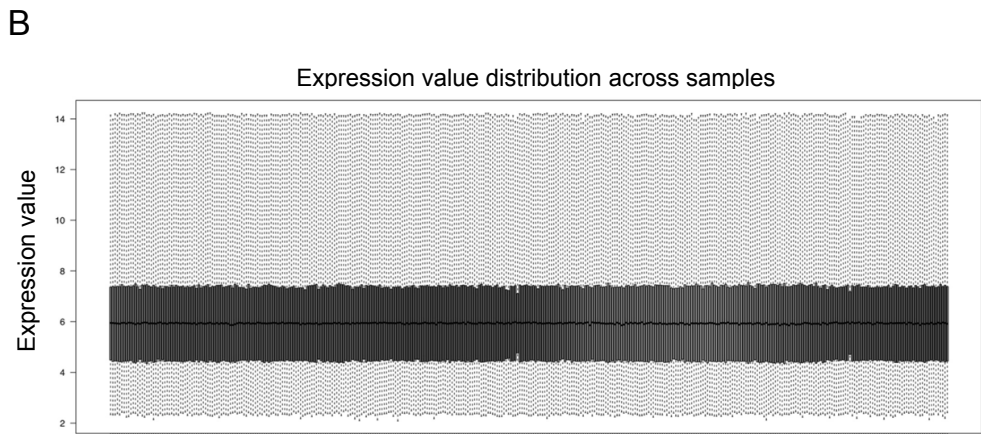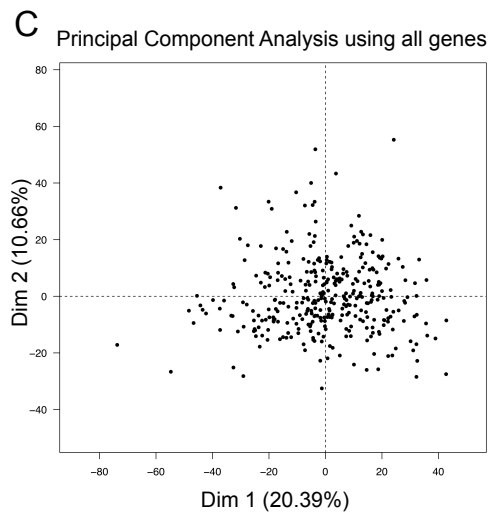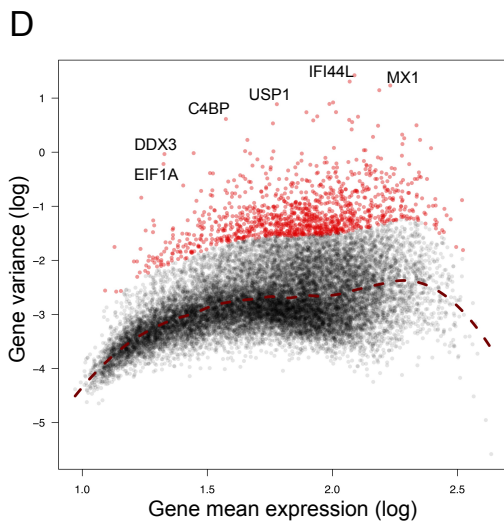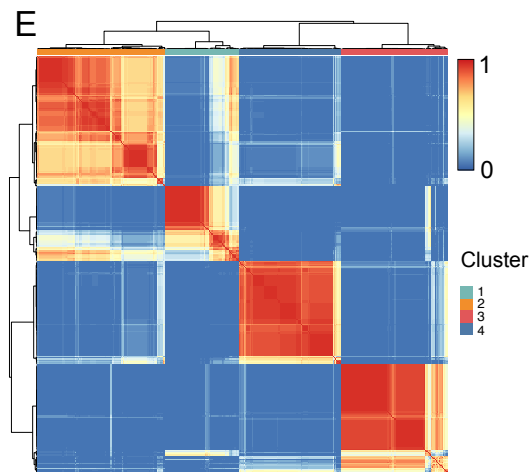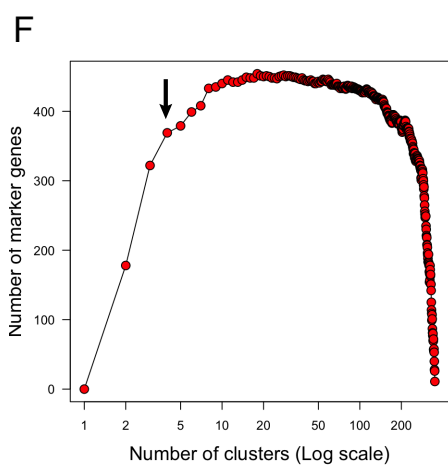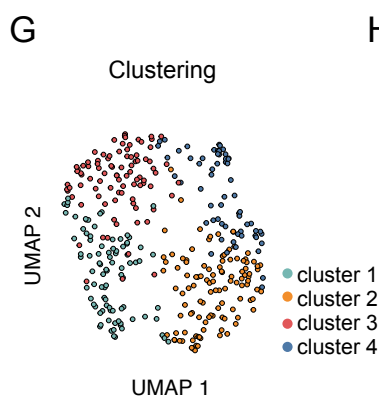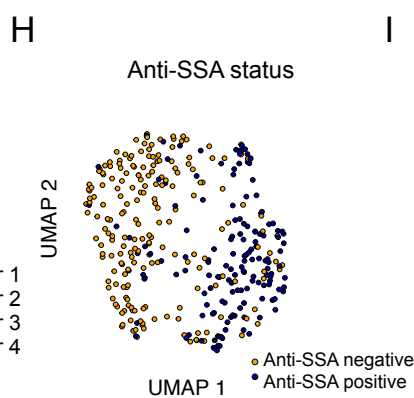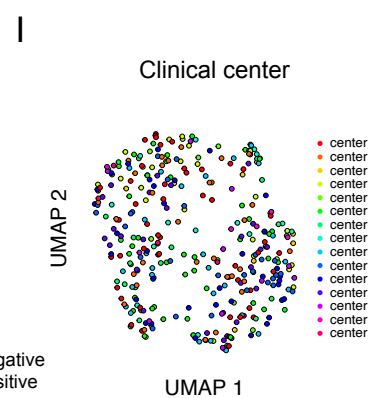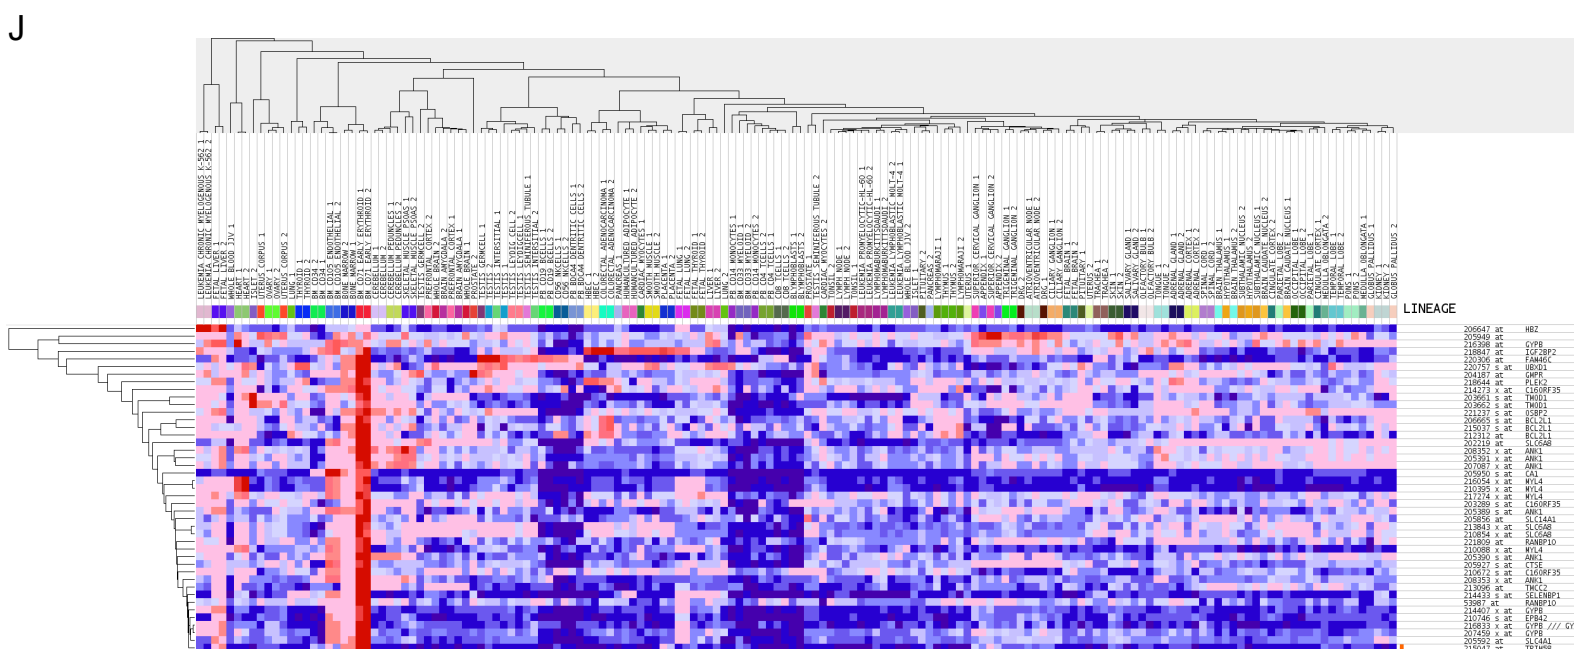

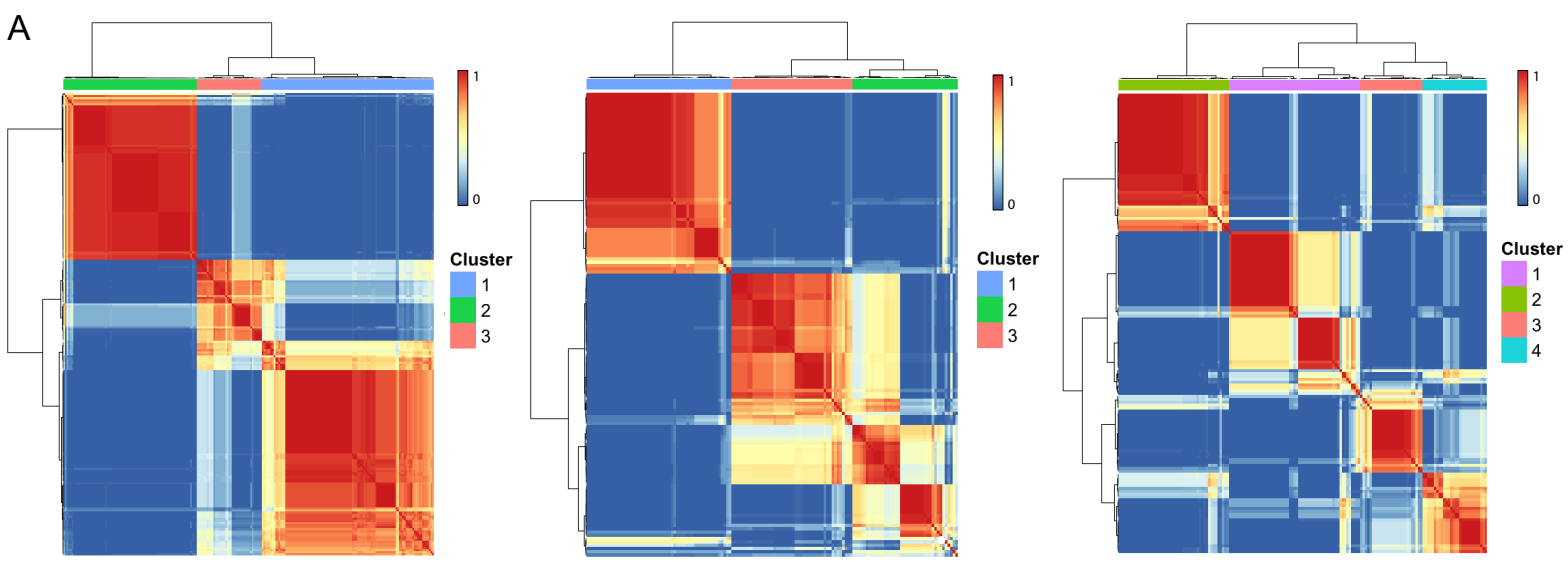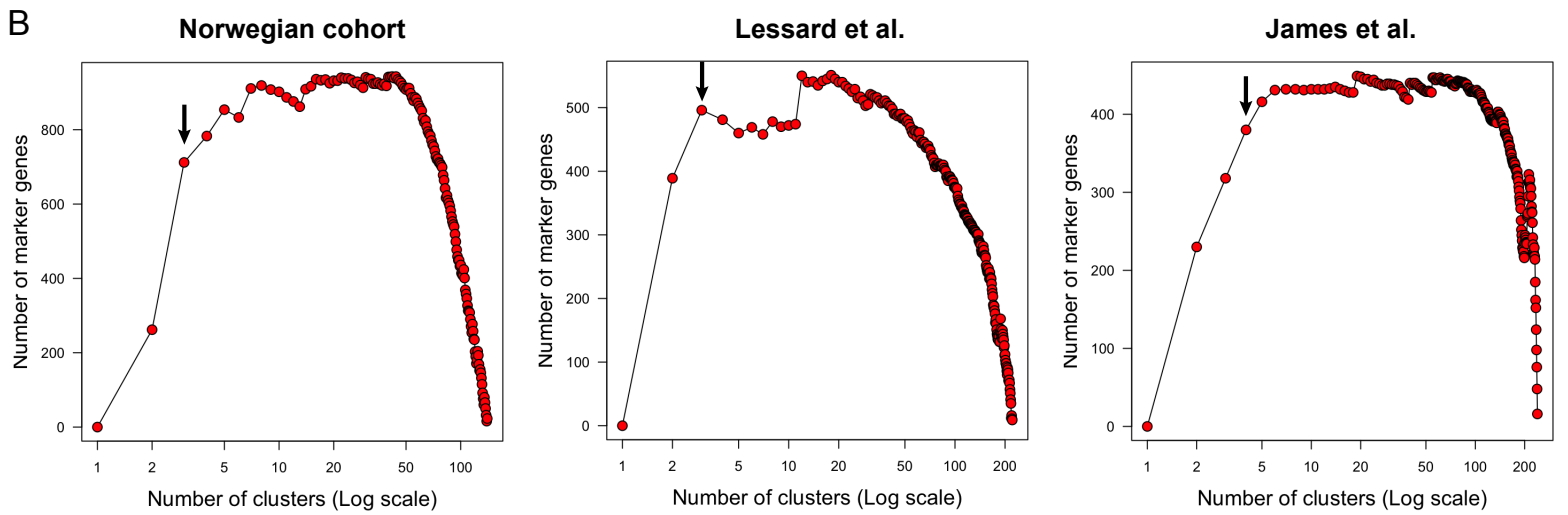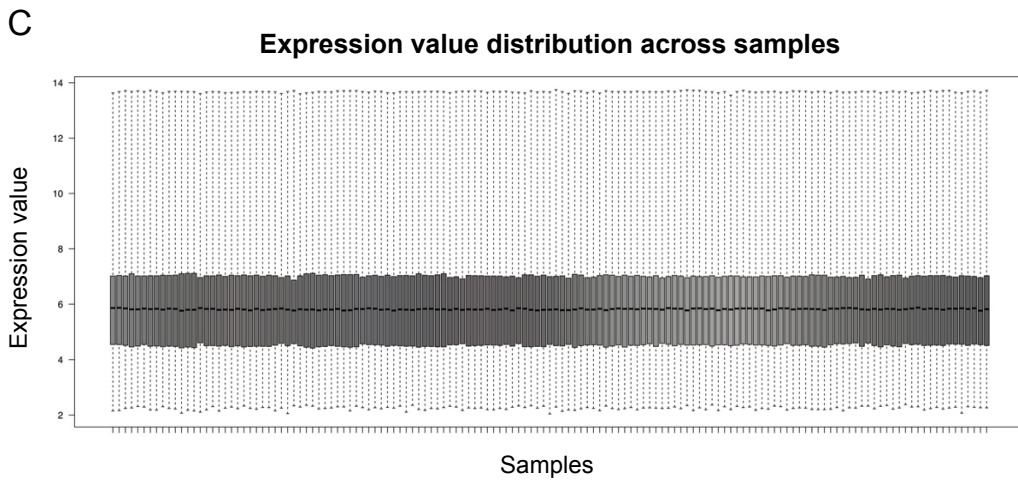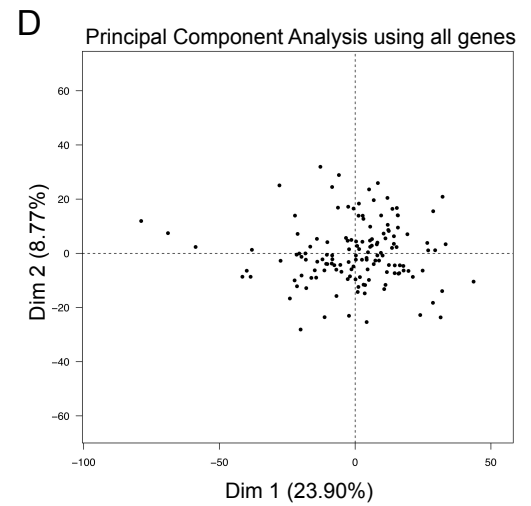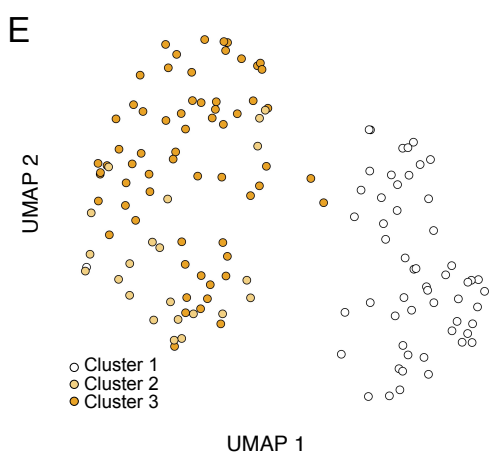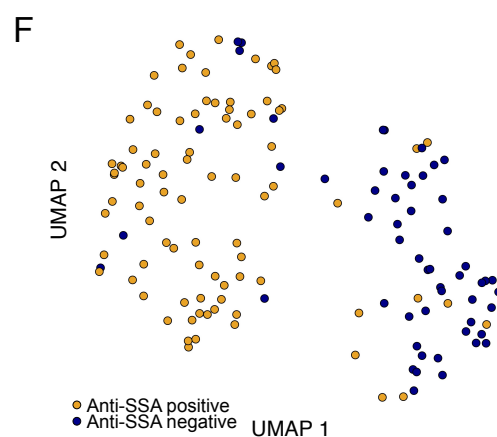

**A**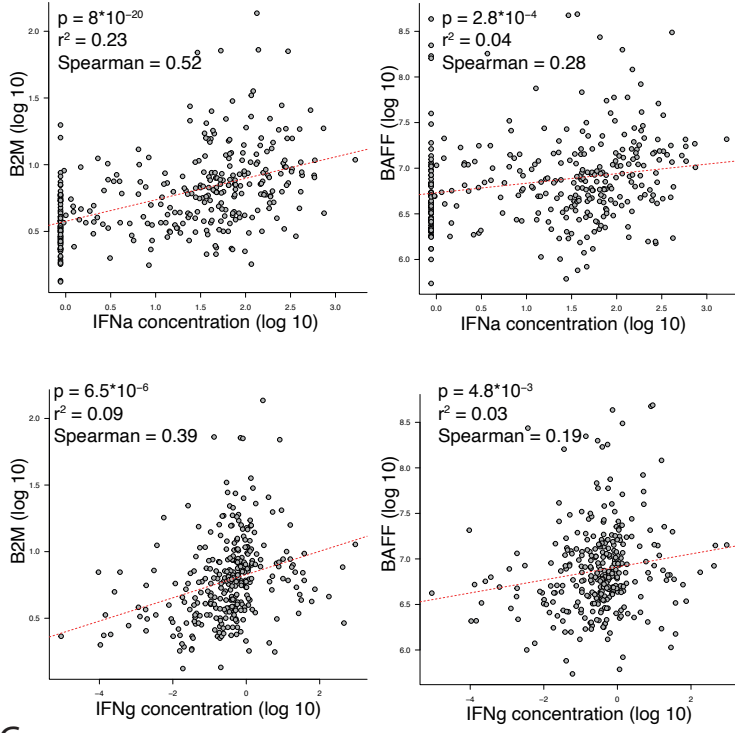**B**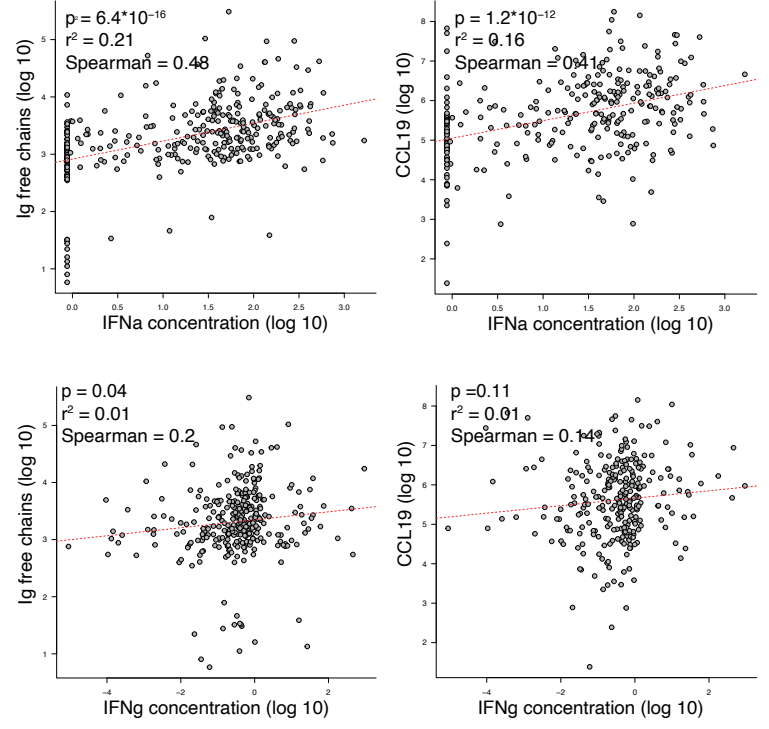**C**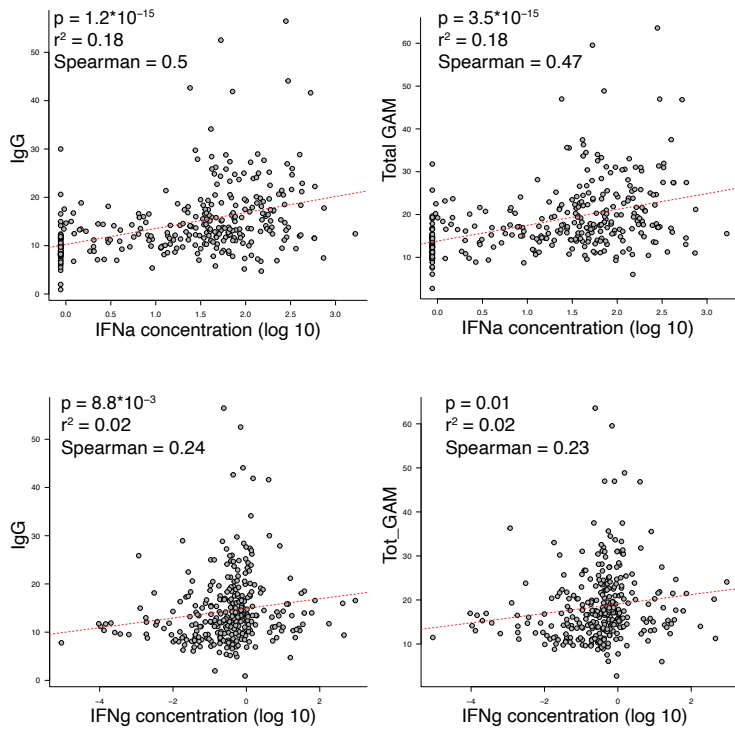**D**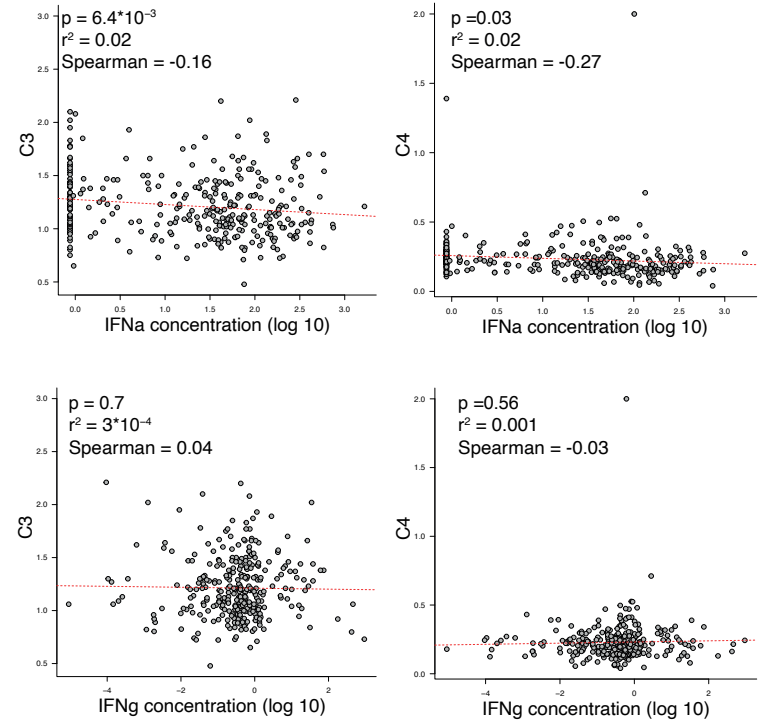**E**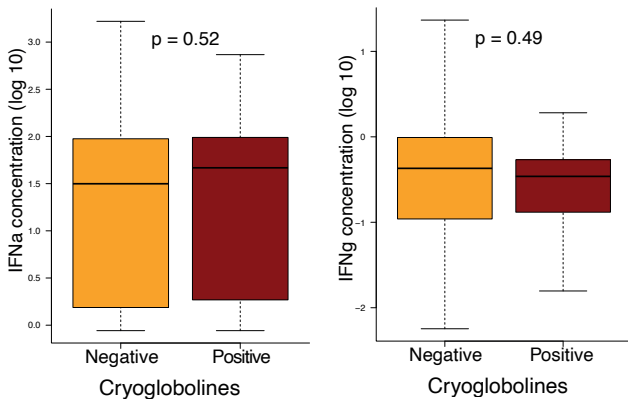**F**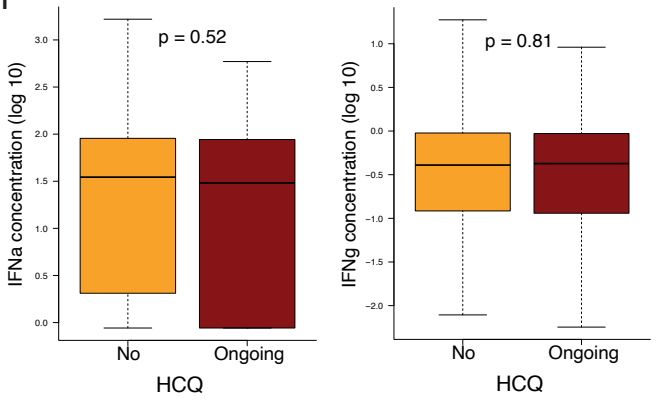

**A**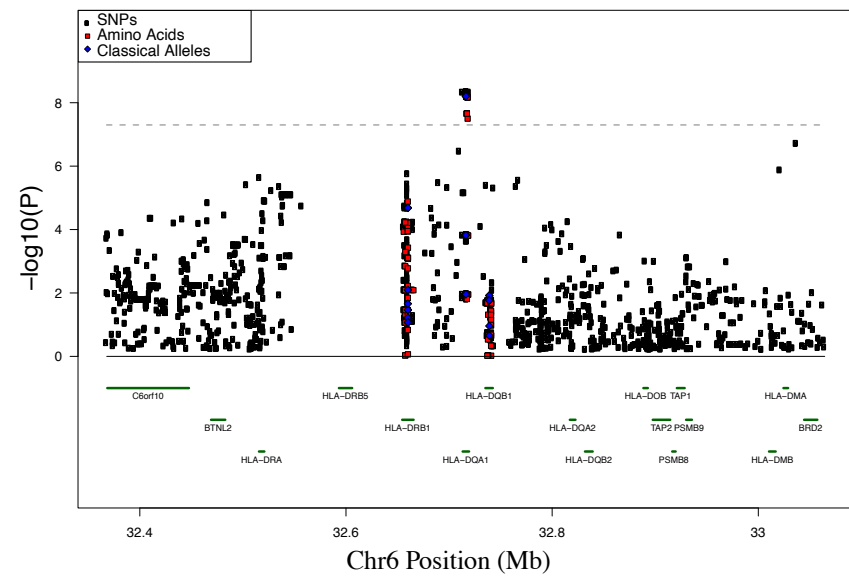**B**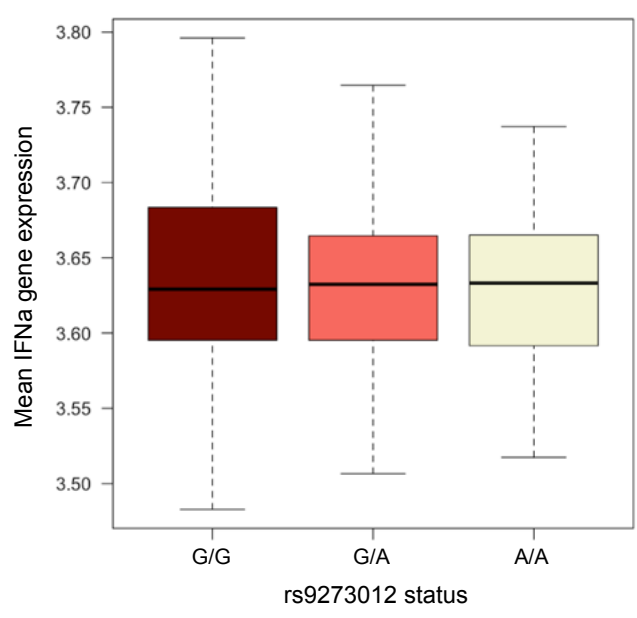**C**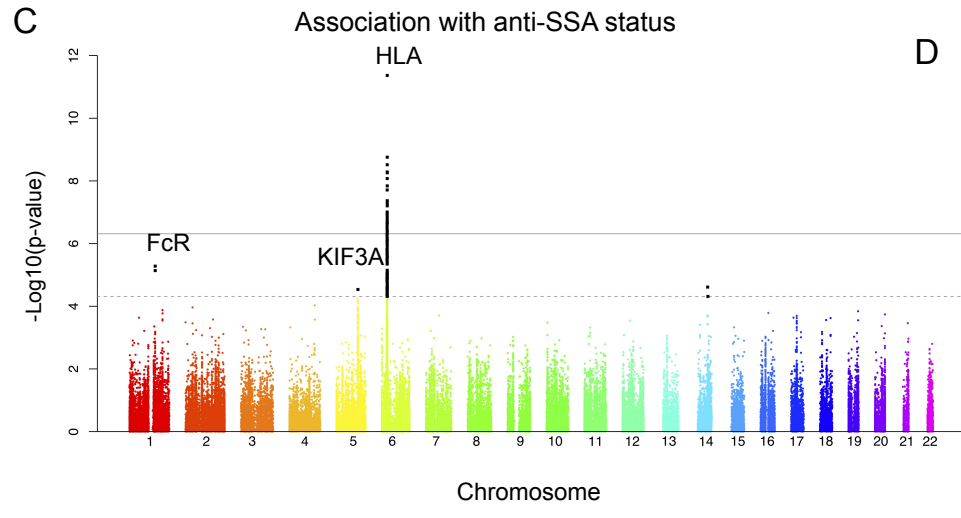**D**

| HLA-DR-DQ Haplotypes |                   |                   |               |
|----------------------|-------------------|-------------------|---------------|
| DRB1                 | DQA1              | DQB1              | Frequency (%) |
| <i>DRB1*03:01</i>    | <i>DQA1*05:01</i> | <i>DQB1*02:01</i> | 23.1%         |
| <i>DRB1*03:01</i>    | <i>DQA1*05:01</i> | <i>DQB1*03:01</i> | 11.6%         |
| <i>DRB1*03:01</i>    | <i>DQA1*01:02</i> | <i>DQB1*06:02</i> | 8.4%          |
| <i>DRB1*04:05</i>    | <i>DQA1*03:01</i> | <i>DQB1*02:01</i> | 7.8%          |
| <i>DRB1*11:01</i>    | <i>DQA1*01:02</i> | <i>DQB1*06:02</i> | 7.8%          |
| <i>DRB1*01:01</i>    | <i>DQA1*01:02</i> | <i>DQB1*06:02</i> | 6.5%          |
