# Supplementary material for: Variability of Primary Sjögren's Syndrome Is Driven by Interferon‐α and Interferon‐α Blood Levels Are Associated With the Class II HLA–DQ Locus
Source: PubMed Central journal article supplement — Arthritis Rheumatol. 2022 Nov 2;74(12):1991–2002. doi: 10.1002/art.42265 (PMC10092541; doi:10.1002/art.42265), 2022-11-02
Supplement: ART-74-1991-s006.pdf [file ART-74-1991-s006.pdf]

| Gene       | Log10.Fdr. | Max_Log2FC | Cluster.1 | Cluster.2 | Cluster.3 | Cluster.4 |
|------------|------------|------------|-----------|-----------|-----------|-----------|
| OAS3       | 52,27      | 2,57       | 8,04      | 10,34     | 10,61     | 10,95     |
| IFI44      | 44,94      | 2,94       | 7,88      | 10,83     | 10,8      | 10,76     |
| XAF1       | 49,68      | 1,85       | 9,41      | 11,12     | 11,26     | 11,4      |
| XAF1.1     | 26,28      | 1,75       | 9,41      | 11,12     | 11,26     | 11,4      |
| EIF2AK2    | 39,37      | 1,52       | 9,64      | 10,89     | 11,16     | 11,22     |
| ZBP1       | 35,96      | 1,27       | 9,99      | 11        | 11,25     | 11,45     |
| MT2A       | 22,51      | 1,11       | 10,29     | 11,1      | 11,39     | 11,52     |
| PRIC285    | 39,68      | 1          | 9,87      | 10,64     | 10,87     | 11,18     |
| PARP12     | 44,8       | 1,19       | 9,27      | 10,38     | 10,46     | 10,54     |
| PARP9      | 31,49      | 1,08       | 9,31      | 10,32     | 10,39     | 10,46     |
| PARP9.1    | 21,13      | 1,04       | 9,31      | 10,32     | 10,39     | 10,46     |
| PARP14     | 33,77      | 1,03       | 9,26      | 10,16     | 10,28     | 10,4      |
| SCO2       | 29,98      | 1,09       | 9,21      | 10,12     | 10,3      | 10,28     |
| HLA.DRB6.1 | 3,89       | 1,06       | 9,14      | 10        | 10,21     | 10,4      |
| SAMD9L     | 40,43      | 1,44       | 8,9       | 10,07     | 10,34     | 10,45     |
| TRIM22     | 30,86      | 1,3        | 8,93      | 10,23     | 10,11     | 10,14     |
| IFI35      | 38,61      | 1,26       | 9,51      | 10,44     | 10,78     | 10,87     |
| LAP3       | 30,08      | 1,23       | 8,74      | 9,75      | 9,97      | 10,15     |
| TNFAIP6    | 12,03      | 1,22       | 9,49      | 10,58     | 10,72     | 10,15     |
| TMEM123    | 13,75      | 1,08       | 9,87      | 10,95     | 10,72     | 10,39     |
| OASL       | 43,47      | 2,08       | 8,76      | 10,5      | 10,83     | 10,93     |
| OASL.1     | 32,63      | 1,02       | 8,76      | 10,5      | 10,83     | 10,93     |
| OAS1       | 44,2       | 2,02       | 7,67      | 8,77      | 9,16      | 9,34      |
| OAS1.1     | 41,67      | 2,05       | 7,67      | 8,77      | 9,16      | 9,34      |
| OAS1.2     | 20,64      | 1,44       | 7,67      | 8,77      | 9,16      | 9,34      |
| OAS1.3     | 16,11      | 1,49       | 7,67      | 8,77      | 9,16      | 9,34      |
| IFIT3      | 43,33      | 2,24       | 7,32      | 9,12      | 8,99      | 9,34      |
| IFIT3.1    | 34,41      | 1,82       | 7,32      | 9,12      | 8,99      | 9,34      |
| IFIT3.2    | 33,85      | 1,8        | 7,32      | 9,12      | 8,99      | 9,34      |
| HERC6      | 33,9       | 1,26       | 8         | 9,21      | 9,26      | 9,42      |
| IFIH1      | 28,2       | 1,12       | 8,09      | 9,16      | 9,21      | 9,35      |
| HES4       | 24,3       | 1,63       | 7,97      | 9,41      | 9,6       | 9,51      |
| GBP1       | 19,9       | 1,22       | 8,3       | 9,48      | 9,43      | 9,45      |
| GBP1.1     | 19,73      | 1,18       | 8,3       | 9,48      | 9,43      | 9,45      |
| TIMM10     | 9,42       | 1,12       | 7,88      | 9         | 8,77      | 8,97      |
| SAMD9      | 17,3       | 1,16       | 8,75      | 9,91      | 9,87      | 9,39      |
| RSAD2      | 50,2       | 3,11       | 7,4       | 10,34     | 10,51     | 10,46     |
| OAS2       | 49,7       | 1,81       | 9,9       | 11,47     | 11,72     | 12,1      |
| OAS2.1     | 41,68      | 1,15       | 9,9       | 11,47     | 11,72     | 12,1      |
| OAS2.2     | 33,18      | 1,28       | 9,9       | 11,47     | 11,72     | 12,1      |
| HERC5      | 49,01      | 2,35       | 9,61      | 11,75     | 11,96     | 12        |
| EPST11     | 48,91      | 2,41       | 9,47      | 11,7      | 11,89     | 12,01     |
| LY6E       | 46,56      | 2,31       | 10,15     | 12,16     | 12,46     | 12,68     |
| ISG15      | 43,77      | 2,76       | 9,84      | 12,6      | 12,5      | 12,59     |
| IFIT2      | 35,59      | 1,7        | 10,45     | 12,01     | 12,15     | 12,18     |

|             |       |      |       |       |       |       |
|-------------|-------|------|-------|-------|-------|-------|
| IFI6        | 31,01 | 2,32 | 11,1  | 12,28 | 12,22 | 12    |
| IFI6.1      | 11,92 | 1,18 | 11,1  | 12,28 | 12,22 | 12    |
| SPATS2L     | 32,32 | 1,19 | 6,68  | 7,66  | 7,87  | 8,11  |
| BATF2       | 19,51 | 1,07 | 6,83  | 7,46  | 7,9   | 7,93  |
| USP18       | 30,76 | 1,31 | 6,36  | 7,52  | 7,67  | 7,92  |
| RTP4        | 31,76 | 1,09 | 6,96  | 8,06  | 8,02  | 8,18  |
| DDX60       | 30,09 | 1,18 | 7,05  | 8,23  | 8,17  | 8,21  |
| OTOF        | 16,86 | 1,55 | 6,29  | 7,63  | 7,85  | 8,53  |
| IFIT5       | 23,92 | 1,05 | 6,75  | 7,81  | 7,79  | 7,46  |
| CHMP5       | 14,8  | 1,24 | 7,2   | 8,15  | 7,89  | 7,41  |
| SERPING1    | 27,63 | 1,52 | 7,1   | 8,19  | 8,63  | 8,88  |
| LOC10013051 | 5,6   | 1    | 7,94  | 8,14  | 7,51  | 7,67  |
| MPP1        | 12,71 | 1,12 | 10,73 | 9,76  | 10,87 | 10,33 |
| LOC650832   | 12,04 | 1,1  | 10,6  | 9,69  | 10,79 | 10,35 |
| LOC440359   | 8,79  | 1,2  | 10,86 | 9,9   | 11,1  | 10,35 |
| NRGN        | 7,1   | 1,08 | 10,72 | 9,75  | 10,83 | 10,64 |
| FAM104A     | 11,11 | 1,03 | 10,55 | 10,06 | 11,09 | 10,17 |
| MYL4        | 6,55  | 1,26 | 10,34 | 9,83  | 11,09 | 10,02 |
| LOC388588   | 2,71  | 1,32 | 10,18 | 9,86  | 11,18 | 10,07 |
| CARM1       | 8,29  | 1,11 | 10,72 | 10,07 | 11,18 | 10,78 |
| FAM46C      | 8,13  | 1,32 | 10,93 | 10,18 | 11,5  | 10,21 |
| EPB42       | 10,2  | 1,55 | 10,65 | 9,47  | 11,02 | 9,84  |
| HBD         | 7,23  | 1,47 | 10,47 | 9,49  | 10,96 | 9,54  |
| PI3         | 4,81  | 1,15 | 11,22 | 10,08 | 10,78 | 10,45 |
| EPB49       | 9,38  | 1,56 | 10,22 | 9,31  | 10,87 | 10,09 |
| C20orf108   | 12,02 | 1,4  | 10,08 | 9,1   | 10,49 | 9,34  |
| RBM38       | 10    | 1,23 | 10,15 | 9,14  | 10,24 | 9,39  |
| RBM38.1     | 8,85  | 1,11 | 10,15 | 9,14  | 10,24 | 9,39  |
| SELENBP1    | 9,75  | 1,64 | 10,28 | 9,05  | 10,7  | 9,45  |
| CDC34       | 8,86  | 1,01 | 9,83  | 9,14  | 10,15 | 9,38  |
| LGALS3      | 5,47  | 1,01 | 9,69  | 9,15  | 10,16 | 9,26  |
| TSPAN5      | 8,88  | 1,11 | 10,2  | 9,38  | 10,49 | 9,48  |
| E2F2        | 8,16  | 1,15 | 9,99  | 9,22  | 10,36 | 9,86  |
| PIP5K2A     | 11,41 | 1,24 | 9,1   | 8,17  | 9,41  | 8,62  |
| C16orf35    | 5,19  | 1,05 | 8,67  | 8,09  | 9,14  | 8,81  |
| TMEM158     | 4,46  | 1,14 | 8,81  | 8,18  | 9,32  | 8,67  |
| SLC6A10P    | 10,08 | 1,56 | 9,02  | 8,11  | 9,68  | 8,97  |
| IFIT1L      | 8,07  | 1,53 | 9,1   | 8,35  | 9,88  | 8,75  |
| GYPE        | 7,4   | 1,35 | 9,04  | 8,41  | 9,77  | 8,4   |
| IGF2BP2     | 9,8   | 1,11 | 9,4   | 8,6   | 9,72  | 8,93  |
| GMPR        | 8,15  | 1,24 | 9,46  | 8,5   | 9,75  | 8,94  |
| GRINA       | 8,43  | 1,22 | 8,96  | 8,45  | 9,38  | 8,98  |
| RNF10       | 7,74  | 1,1  | 9,18  | 8,48  | 9,57  | 8,98  |
| LCN2        | 3,7   | 1,05 | 9,1   | 8,7   | 9,75  | 8,91  |
| PDZK1IP1    | 7,65  | 1,06 | 9,48  | 8,58  | 9,64  | 8,63  |
| ST6GALNAC4  | 7,44  | 1,26 | 9,42  | 8,75  | 10,02 | 9,22  |

|             |       |      |       |       |       |       |
|-------------|-------|------|-------|-------|-------|-------|
| ST6GALNAC4  | 6,36  | 1,12 | 9,42  | 8,75  | 10,02 | 9,22  |
| ALAS2       | 7,3   | 1,78 | 9,52  | 8,47  | 10,25 | 9,09  |
| ALAS2.2     | 6,36  | 1,12 | 9,52  | 8,47  | 10,25 | 9,09  |
| TMOD1       | 11,3  | 1,33 | 8,45  | 7,46  | 8,79  | 7,83  |
| FECH        | 10,06 | 1,27 | 8,37  | 7,56  | 8,83  | 7,42  |
| KRT1        | 7,27  | 1,38 | 8,36  | 7,37  | 8,75  | 7,6   |
| GYPB        | 7,14  | 1,2  | 8,28  | 7,7   | 8,91  | 7,62  |
| SLC4A1      | 7,06  | 1,09 | 8,32  | 7,38  | 8,46  | 7,66  |
| OSBP2       | 10,44 | 1,42 | 8,74  | 7,42  | 8,84  | 7,99  |
| TNS1        | 9,54  | 1,33 | 8,58  | 7,53  | 8,86  | 8,1   |
| SMOX        | 6,97  | 1,03 | 8,36  | 7,65  | 8,67  | 8,33  |
| SMOX.1      | 6,83  | 1,12 | 8,36  | 7,65  | 8,67  | 8,33  |
| FKBP8       | 6,62  | 1,01 | 8,33  | 7,86  | 8,87  | 8,25  |
| RAB3IL1     | 7,84  | 1,08 | 7,97  | 7,22  | 8,29  | 7,59  |
| SLC6A8      | 8,71  | 1,18 | 7,66  | 6,94  | 8,12  | 7,57  |
| RUNDC3A     | 6,5   | 1,02 | 7,63  | 7,01  | 8,03  | 7,4   |
| TUBB2A      | 3,96  | 1,1  | 7,69  | 6,96  | 8,06  | 7,24  |
| DPM2        | 9,9   | 1,11 | 8,73  | 7,96  | 9,07  | 8,25  |
| VWCE        | 5,58  | 1,22 | 8,68  | 7,75  | 8,97  | 8,54  |
| SESN3       | 11,32 | 1,1  | 8,82  | 8,3   | 9,4   | 8,19  |
| HBZ         | 5,29  | 1,53 | 7,25  | 6,74  | 8,27  | 7,76  |
| XK          | 11,15 | 1,29 | 7,73  | 7,27  | 8,56  | 7,19  |
| CA1         | 10,29 | 1,61 | 9,58  | 8,7   | 10,3  | 8,42  |
| GSPT1       | 11,71 | 1,04 | 12,02 | 11,24 | 12,28 | 11,52 |
| ADIPOR1     | 11,29 | 1,35 | 11,91 | 11,05 | 12,26 | 11,56 |
| ADIPOR1.1   | 11,23 | 1,21 | 11,91 | 11,05 | 12,26 | 11,56 |
| WDR40A      | 10,88 | 1,23 | 12,05 | 11,14 | 12,38 | 11,32 |
| STRADB      | 9,96  | 1,3  | 11,91 | 11,05 | 12,35 | 11,16 |
| ASCC2       | 9,62  | 1,03 | 11,71 | 10,96 | 11,99 | 11,54 |
| AHSP        | 8,59  | 1,2  | 11,91 | 11,35 | 12,56 | 11,08 |
| SNCA        | 9,15  | 1,5  | 11,67 | 10,66 | 12,16 | 10,94 |
| SNCA.1      | 8,59  | 1,39 | 11,67 | 10,66 | 12,16 | 10,94 |
| LOC389599   | 10,78 | 1,47 | 11,31 | 10,36 | 11,83 | 10,71 |
| BCL2L1      | 10,95 | 1,26 | 12,42 | 11,48 | 12,74 | 12,02 |
| HBM         | 5,74  | 1,09 | 12,21 | 11,78 | 12,88 | 12,05 |
| IFI44L      | 52,27 | 3,63 | 8,38  | 11,87 | 12    | 12,13 |
| IFI27       | 28,73 | 4,44 | 7,77  | 11,16 | 12,2  | 12,02 |
| LOC286444.1 | 5,39  | 1,1  | 12,74 | 12,75 | 12,41 | 12,49 |
| RPS29.2     | 16,84 | 1,25 | 13,33 | 13,78 | 13,16 | 12,6  |
| IFIT1       | 44,36 | 3,01 | 6,27  | 6,89  | 6,81  | 6,81  |
| FBXO7       | 10,06 | 1,23 | 6,85  | 6,74  | 6,74  | 6,79  |
| IRF7        | 39,68 | 1,36 | 6,11  | 6,14  | 6,16  | 6,2   |
| IRF7.1      | 37,37 | 1,46 | 6,11  | 6,14  | 6,16  | 6,2   |
| C5orf4      | 10,18 | 1,26 | 6,12  | 6,12  | 6,15  | 6,14  |
| BPGM        | 6,56  | 1,09 | 6,11  | 6,13  | 6,2   | 6,1   |
| MAP2K3      | 12,77 | 1,11 | 6,01  | 5,99  | 6,03  | 6,01  |

|             |       |      |       |       |       |       |
|-------------|-------|------|-------|-------|-------|-------|
| MBNL3       | 9,2   | 1,27 | 6,03  | 6,02  | 6,07  | 5,97  |
| MBNL3.1     | 8,62  | 1,32 | 6,03  | 6,02  | 6,07  | 5,97  |
| LOC10013111 | 9,43  | 1,59 | 5,92  | 5,94  | 5,98  | 5,95  |
| BSG         | 6,09  | 1,04 | 5,97  | 5,98  | 5,95  | 5,96  |
| ATP6V0C.1   | 9,25  | 1,01 | 6,28  | 6,32  | 6,32  | 6,28  |
| ANKRD9      | 6,29  | 1,01 | 6,38  | 6,27  | 6,41  | 6,35  |
| LOC728602   | 4,56  | 1,08 | 6,33  | 6,22  | 6,38  | 6,31  |
| RPL26       | 14,07 | 1,06 | 8,59  | 9,53  | 8,48  | 7,67  |
| MX1         | 48,07 | 2    | 11,31 | 13,05 | 13,31 | 13,59 |
| IFITM3      | 23,57 | 1,73 | 11,66 | 13,27 | 13,39 | 13,6  |
