# Supplementary material for: Variability of Primary Sjögren's Syndrome Is Driven by Interferon‐α and Interferon‐α Blood Levels Are Associated With the Class II HLA–DQ Locus
Source: PubMed Central journal article supplement — Arthritis Rheumatol. 2022 Nov 2;74(12):1991–2002. doi: 10.1002/art.42265 (PMC10092541; doi:10.1002/art.42265), 2022-11-02
Supplement: ART-74-1991-s008.pdf [file ART-74-1991-s008.pdf]

| Gene     | Log10.Fdr. | Max_Log2FC | Cluster.1 | Cluster.2 | Cluster.3 |
|----------|------------|------------|-----------|-----------|-----------|
| IFI44L   | 55,86      | 4,06       | 6,03      | 9,12      | 10,09     |
| RSAD2    | 55,66      | 3,4        | 6,94      | 9,45      | 10,34     |
| IFIT1    | 48,21      | 3,12       | 7,29      | 9,42      | 10,41     |
| OAS1     | 53,46      | 2,42       | 7,71      | 9,36      | 10,13     |
| IFIT3    | 49,99      | 2,08       | 8,67      | 10,19     | 10,74     |
| MX1      | 46,39      | 2,48       | 8,27      | 9,85      | 10,75     |
| IFI6     | 47,08      | 2,02       | 8,18      | 9,75      | 10,2      |
| EIF2AK2  | 46,4       | 1,58       | 8,43      | 9,47      | 10,01     |
| DDX58    | 42,02      | 1,25       | 8,66      | 9,42      | 9,91      |
| SAMD9L   | 34,34      | 1,2        | 8,72      | 9,38      | 9,92      |
| TRIM22   | 41,75      | 1,21       | 8,53      | 9,25      | 9,73      |
| UBE2L6   | 27,82      | 1,07       | 8,67      | 9,27      | 9,74      |
| IFIT2    | 42,55      | 1,71       | 8,66      | 9,7       | 10,37     |
| PARP12   | 40,12      | 1,04       | 8,36      | 8,92      | 9,4       |
| IFI44    | 55,66      | 3,12       | 6,13      | 8,61      | 9,26      |
| CMPK2    | 53,46      | 2,52       | 6,45      | 8,37      | 8,97      |
| EPSTI1   | 51,5       | 2,45       | 6,87      | 8,82      | 9,32      |
| OAS3     | 50,72      | 1,98       | 7,32      | 8,79      | 9,3       |
| LY6E     | 45,74      | 1,94       | 7,46      | 8,73      | 9,39      |
| DDX60    | 47,4       | 1,73       | 7,32      | 8,46      | 9,06      |
| PLSCR1   | 38,51      | 1,66       | 7,37      | 8,31      | 9,02      |
| ZCCHC2   | 40,12      | 1,45       | 7,27      | 8,1       | 8,72      |
| TNFAIP6  | 10,44      | 1,02       | 7,56      | 8,31      | 8,59      |
| IFIH1    | 43,97      | 1,54       | 6,98      | 7,9       | 8,52      |
| IFIT5    | 39,78      | 1,45       | 6,84      | 7,78      | 8,29      |
| OASL     | 36,26      | 1,12       | 7,2       | 7,89      | 8,32      |
| XAF1     | 42,91      | 1,31       | 6,81      | 7,44      | 8,12      |
| CCR1     | 26,38      | 1,2        | 7,76      | 8,2       | 8,96      |
| IL1RN    | 17,35      | 1,09       | 6,67      | 7,07      | 7,76      |
| HERC5    | 49,42      | 2,66       | 7,12      | 9,01      | 9,78      |
| ZBP1     | 41,17      | 1,31       | 6,11      | 6,96      | 7,42      |
| ISG15    | 34,55      | 1,2        | 6,25      | 7,24      | 7,45      |
| IFI27    | 18,56      | 1,65       | 6,06      | 7,27      | 7,7       |
| JCHAIN   | 4,52       | 1,16       | 7,15      | 6,76      | 7,92      |
| OAS2     | 49,75      | 2,33       | 6,27      | 7,59      | 8,6       |
| SPATS2L  | 43,21      | 2,35       | 5,12      | 6,51      | 7,48      |
| RTP4     | 33,32      | 1,31       | 5,68      | 6,33      | 6,99      |
| USP18    | 41,91      | 2,46       | 3,9       | 5,28      | 6,36      |
| SERPING1 | 24,87      | 1,78       | 3,79      | 5,03      | 5,57      |
